# Supplementary material for: Sinapic Acid Suppresses SARS CoV-2 Replication by Targeting Its Envelope Protein
Source: MDPI journal article supplement (doi:10.3390/antibiotics10040420), 2021-04-11
Supplement: s1 [file s1]

## Supplementary Material

# Sinapic acid Suppresses SARS CoV-2 Replication by Targeting its Envelope Protein

Raha Orfali <sup>1</sup>, Mostafa E. Rateb <sup>2</sup>, Hossam M Hassan <sup>3,4</sup>, Mona Alonazi <sup>5</sup>, Mokhtar R. Gomaa <sup>6</sup>, Noura Mahrous <sup>6</sup>, Mohamed GabAllah <sup>6</sup>, Ahmed Kandeil <sup>6</sup>, Shagufta Perveen <sup>1</sup>, Usama Ramadan Abdelmohsen <sup>7,8,\*</sup> and Ahmed M. Sayed <sup>3,\*</sup>

<sup>1</sup> Department of Pharmacognosy, College of Pharmacy, King Saud University. P. O. Box 22452, Riyadh 11495, Kingdom of Saudi Arabia, [rorfali@ksu.edu.sa](mailto:rorfali@ksu.edu.sa), [shakhan@ksu.edu.sa](mailto:shakhan@ksu.edu.sa).

<sup>2</sup> School of Computing, Engineering & Physical Sciences, University of the West of Scotland, Paisley PA1 2BE, United Kingdom. [Mostafa.Rateb@uws.ac.uk](mailto:Mostafa.Rateb@uws.ac.uk).

<sup>3</sup> Department of Pharmacognosy, Faculty of Pharmacy, Nahda University, Beni-Suef 62513, Egypt, [hossam.mokhtar@nub.edu.eg](mailto:hossam.mokhtar@nub.edu.eg).

<sup>4</sup> Department of Pharmacognosy, Faculty of Pharmacy, Beni-Suef University, Beni-Suef 62513, Egypt.

<sup>5</sup> Department of Biochemistry, Faculty of Science, King Saud University. P. O. Box 12372, Riyadh 11495, Kingdom of Saudi Arabia. [moalonzai@Ksu.edu.sa](mailto:moalonzai@Ksu.edu.sa).

<sup>6</sup> Center of Scientific Excellence for Influenza Virus, Environmental Research Division, National Research Centre, Giza 12622, Egypt. Emails: [noura.mahrous1995@gmail.com](mailto:noura.mahrous1995@gmail.com); [gaballah09@gmail.com](mailto:gaballah09@gmail.com); [Mokhtar.Rizk@human-link.org](mailto:Mokhtar.Rizk@human-link.org); [Kandeil\\_a@hotmail.com](mailto:Kandeil_a@hotmail.com).

<sup>7</sup> Department of Pharmacognosy, Faculty of Pharmacy, Minia University, Minia 61519, Egypt, [usama.ramadan@mu.edu.eg](mailto:usama.ramadan@mu.edu.eg).

<sup>8</sup> Department of Pharmacognosy, Faculty of Pharmacy, Deraya University, 7 Universities Zone, New Minia 61111, Egypt, [Ahmed.mohamed.sayed@nub.edu.eg](mailto:Ahmed.mohamed.sayed@nub.edu.eg).

| Protein                                        | Name                         | Function                                                                                                                  | PDB Code                       |
|------------------------------------------------|------------------------------|---------------------------------------------------------------------------------------------------------------------------|--------------------------------|
| <b>Viral Proteins (Nonstructural proteins)</b> |                              |                                                                                                                           |                                |
| nsp1                                           | -                            | Host translation inhibitor                                                                                                | 7K3N                           |
| nsp2                                           | -                            | Play a role in the modulation of host cell survival signaling pathway by interacting with host PHB and PHB2               | Deposited model in Swiss-Model |
| nsp3                                           | ADP ribose phosphatase       | Activate replicase polyprotein                                                                                            | 6W02                           |
| nsp4                                           | -                            | Participates in the assembly of virally-induced cytoplasmic double-membrane vesicles necessary for viral replication      | Deposited model in Swiss-Model |
| nsp5 (3CL-PRO)                                 | Main protease                | Cleaves the C-terminus of replicase polyprotein at 11 sites                                                               | 6lu7                           |
| nsp6                                           | -                            | Plays a role in the initial induction of autophagosomes                                                                   | Deposited model in Swiss-Model |
| nsp7                                           | -                            | Plays a role in viral RNA synthesis                                                                                       | 6M5I                           |
| nsp8                                           | -                            | Plays a role in viral RNA synthesis                                                                                       | 6M5I                           |
| nsp9                                           | -                            | May participate in viral replication by acting as a ssRNA-binding protein                                                 | 6WC1                           |
| nsp10                                          | -                            | plays an essential role in viral mRNAs cap methylation                                                                    | 6ZPE                           |
| nsp11 (PL-PRO)                                 | Papain-like protease         | Participate in the activation of the replicase polyprotein                                                                | 6WX4                           |
| nsp12 (Pol; RdRP)                              | RNA-directed RNA polymerase  | Responsible for replication and transcription of the viral RNA genome                                                     | 6M71                           |
| nsp13 (Hel)                                    | Helicase                     | Displaying RNA and DNA duplex-unwinding activities with 5' to 3' polarity. Activity of helicase is dependent on magnesium | 5RL6                           |
| nsp14 (ExoN)                                   | Proofreading exoribonuclease | An exoribonuclease activity acting on both ssRNA and dsRNA in a 3' to 5' direction                                        | Deposited model in Swiss-Model |

|                               |                                     |                                                                                                                                                                                                                                                                 |                                |
|-------------------------------|-------------------------------------|-----------------------------------------------------------------------------------------------------------------------------------------------------------------------------------------------------------------------------------------------------------------|--------------------------------|
| Nsp15 (NendoU)                | Uridylate-specific endoribonuclease | Mn(2+)-dependent, uridylate-specific enzyme, which leaves 2'-3'-cyclic phosphates 5' to the cleaved bond.                                                                                                                                                       | 5S6X                           |
| nsp16                         | 2'-O-methyltransferase              | Methyltransferase that mediates mRNA cap 2'-O-ribose methylation to the 5'-cap structure of viral mRNAs                                                                                                                                                         | 6W4H                           |
| <b>Structural proteins</b>    |                                     |                                                                                                                                                                                                                                                                 |                                |
| S glycoprotein                | Spike glycoprotein                  | Binding to human ACE2 receptor and internalization of the virus into the endosomes of the host cell induces conformational changes in the Spike glycoprotein                                                                                                    | 6lzg and 6zb5                  |
| E-protein                     | Envelope small membrane protein     | Plays a central role in virus morphogenesis and assembly                                                                                                                                                                                                        | 7k3g                           |
| M-protein                     | Membrane protein                    | Component of the viral envelope that plays a central role in virus morphogenesis and assembly via its interactions with other viral proteins                                                                                                                    | Deposited model in Swiss-Model |
| N-protein                     | Nucleoprotein                       | Packages the positive strand viral genome RNA into a helical ribonucleocapsid (RNP) and plays a fundamental role during virion assembly through its interactions with the viral genome and membrane protein M                                                   | 6M3M                           |
| <b>Accessory Proteins</b>     |                                     |                                                                                                                                                                                                                                                                 |                                |
| ORF3a                         | ORF3a protein                       | Forms homotetrameric potassium sensitive ion channels (viroporin) and may modulate virus release                                                                                                                                                                | 6XDC                           |
| ORF6                          | ORF6 protein                        | Disrupts cell nuclear import complex formation by tethering karyopherin alpha 2 and karyopherin beta 1 to the membrane                                                                                                                                          | Deposited model in Swiss-Model |
| ORF7a                         | ORF7a protein                       | Plays a role as antagonist of host tetherin (BST2), disrupting its antiviral effect                                                                                                                                                                             | 6w37                           |
| ORF7b                         | ORF7b protein                       | -                                                                                                                                                                                                                                                               | -                              |
| ORF8                          | ORF8 protein                        | May play a role in host-virus interaction                                                                                                                                                                                                                       | 7JTL                           |
| ORF9b                         | ORF9b protein                       | Plays a role in the inhibition of host innate immune response by targeting the mitochondrial-associated adapter MAVS                                                                                                                                            | 6Z4U                           |
| <b>Human-derived Proteins</b> |                                     |                                                                                                                                                                                                                                                                 |                                |
| ACE2                          | Angiotensin converting enzyme 2     | Responsible for attachment of SARS CoV                                                                                                                                                                                                                          | 6LZG                           |
| Furin                         | Furin                               | Activation of S-protein                                                                                                                                                                                                                                         | 6EQX                           |
| TMPRSS2                       | Transmembrane protease, serine 2    | Activation of S-protein                                                                                                                                                                                                                                         | Deposited model in Swiss-Model |
| CatL                          | Cathepsin L                         | Activation of S-protein                                                                                                                                                                                                                                         | 2YJC                           |
| NPR1                          | Neuropilin 1                        | Facilitates viral entry                                                                                                                                                                                                                                         | 3i97                           |
| PHB1                          | Prohibitin subunit1                 | In the mitochondria, together with PHB2, forms large ring complexes (prohibitin complexes) in the inner mitochondrial membrane (IMM) and functions as chaperone protein that stabilizes mitochondrial respiratory enzymes and maintains mitochondrial integrity | Deposited model in Swiss-Model |
| PHB2                          | Prohibitin subunit2                 | In the mitochondria, together with PHB2, forms large ring complexes (prohibitin complexes) in the inner mitochondrial membrane (IMM) and functions as chaperone protein that stabilizes mitochondrial respiratory enzymes and maintains mitochondrial integrity | Deposited model in Swiss-Model |
| AAK1                          | Adaptor Protein 2 Associated Kinase | Participate in viral endocytosis                                                                                                                                                                                                                                | 4WSQ                           |
| GAK                           | Cyclin-G associated kinase          | Participate in viral endocytosis                                                                                                                                                                                                                                | 4y8d                           |

**Table S1.** All SARS CoV-2 related proteins used in this study.

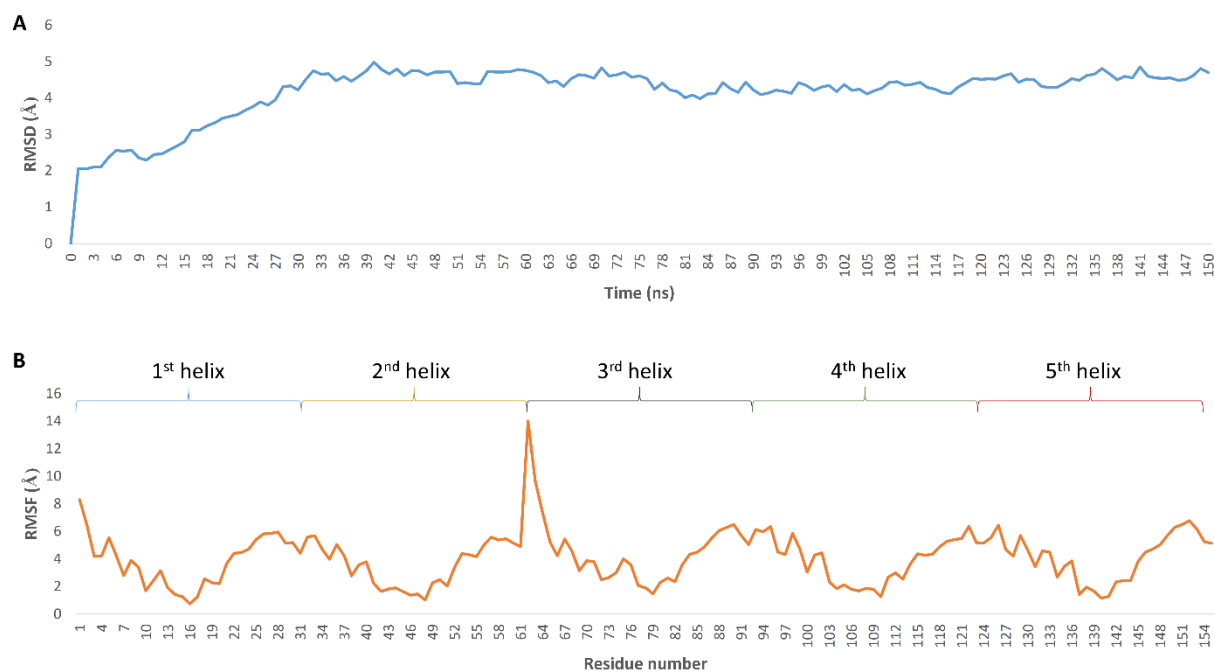

**Figure S1.** RMSD and RMSF of E-protein.

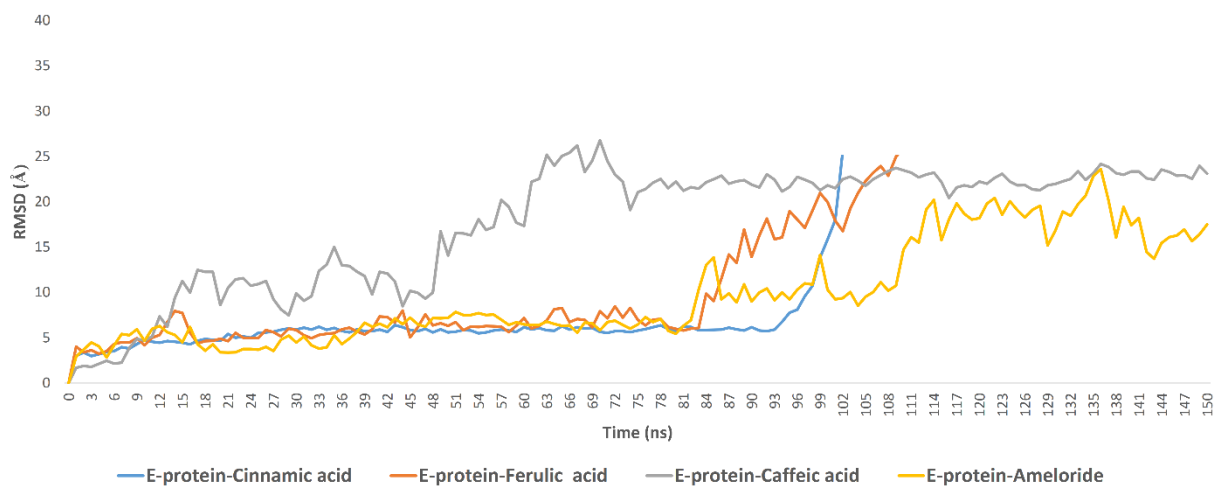

**Figure S2.** RMSDs of cinnamic, ferulic, and caffeic acids along with amelioride inside the binding sites of E-protein during the course of 150 ns MDs.

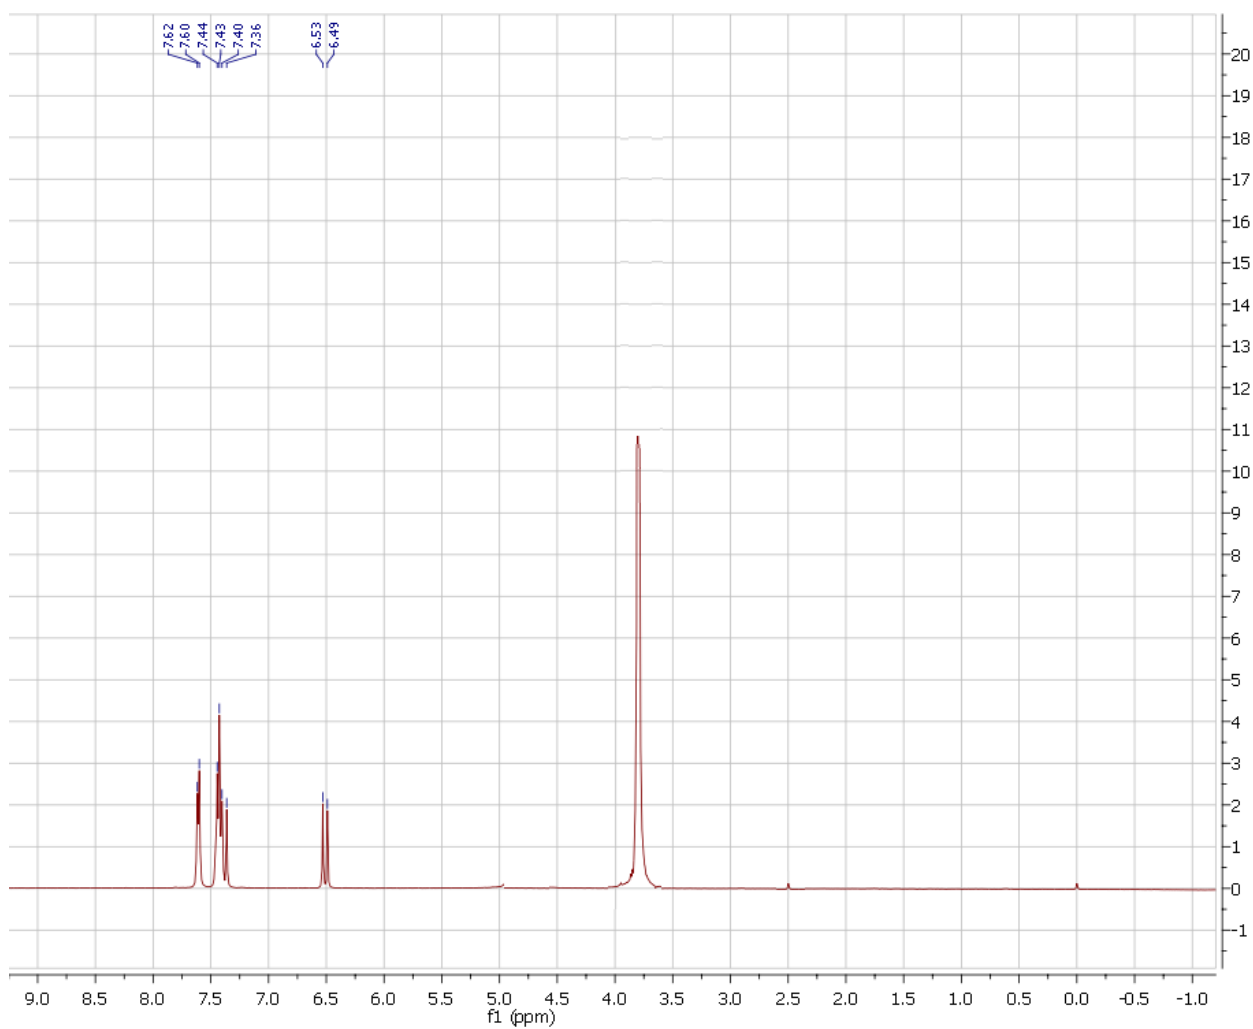

**Figure S3.**  $^1\text{H}$ -NMR spectrum of cinnamic acid in ( $\text{DMSO-}d_6$ ).

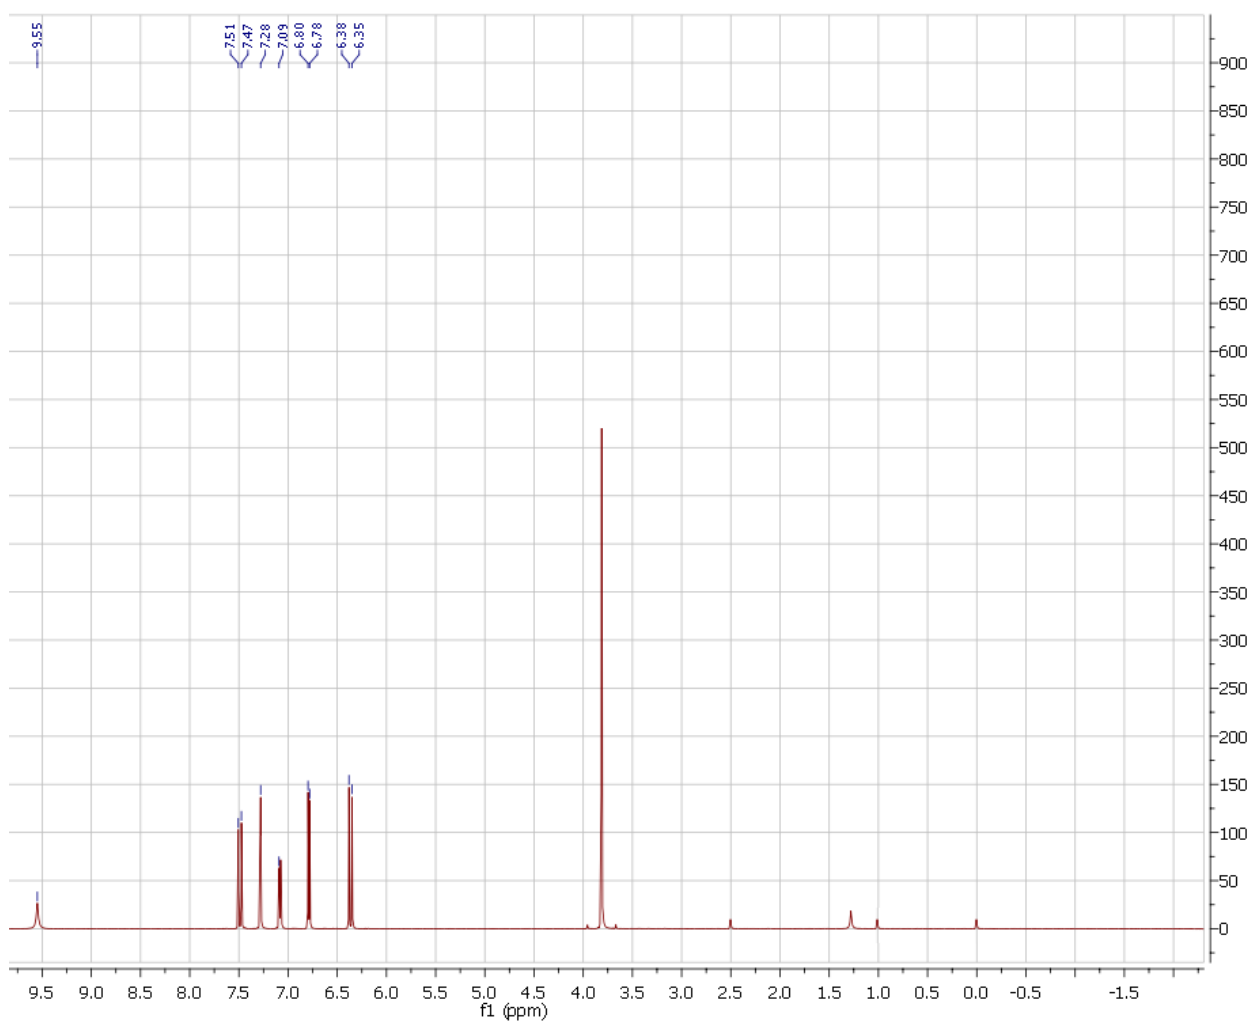

**Figure S4.**  $^1\text{H}$ -NMR spectrum of ferulic acid in  $(\text{DMSO}-d_6)$ .

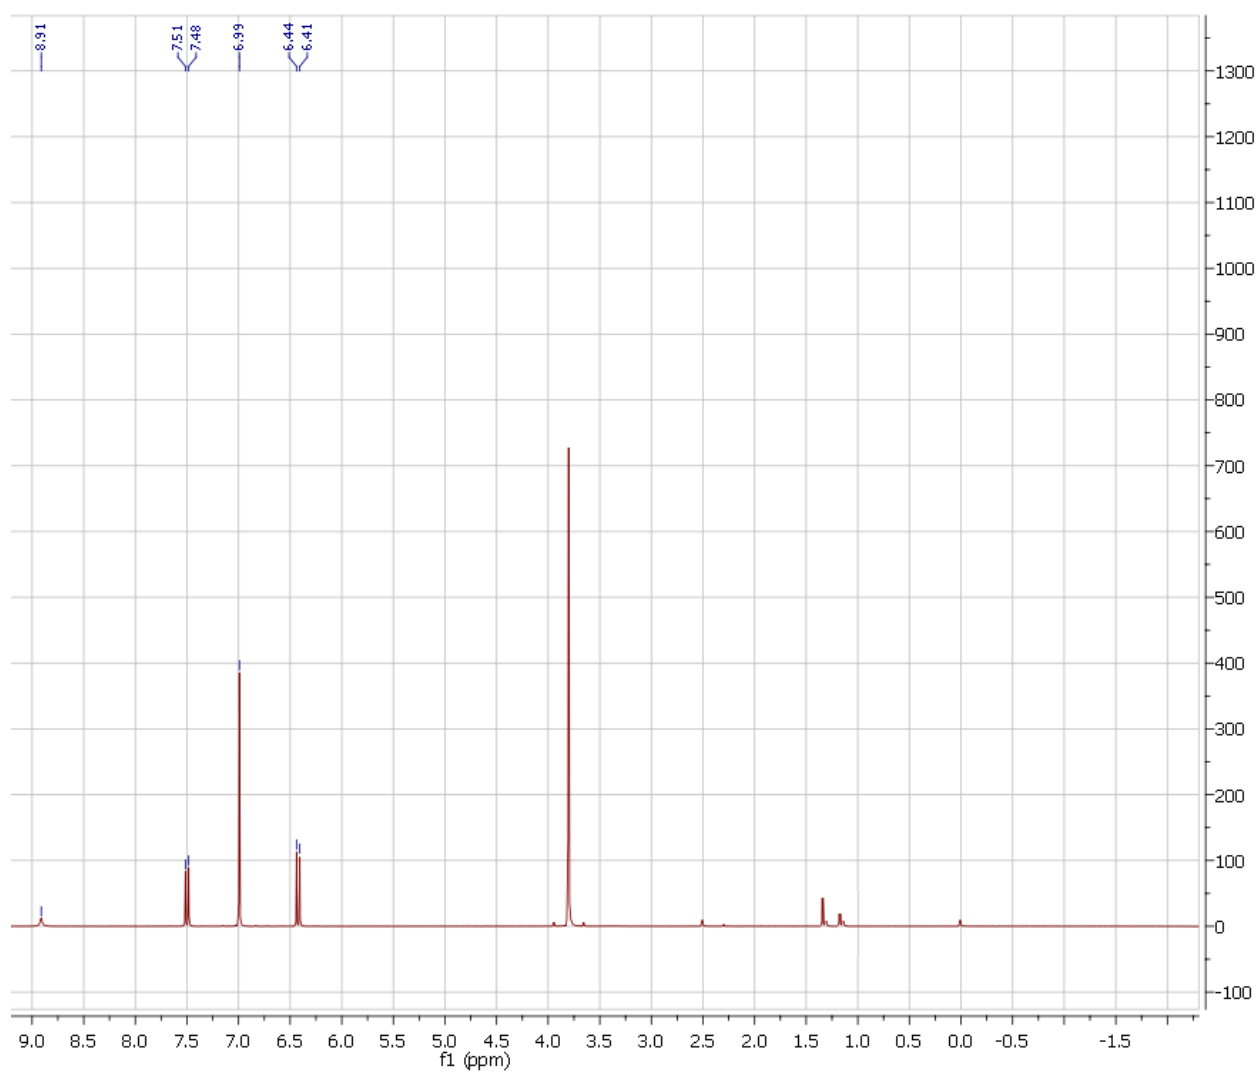

**Figure S5.**  $^1\text{H}$ -NMR spectrum of sinapic acid in  $(\text{DMSO}-d_6)$ .
